# Supplementary material
Source: MDPI journal article supplement (https://www.mdpi.com/2073-4395/12/10/2569)
Supplement: s1 [file s1]

## Supplemental Material

**Table S1** Geographic and soil description and management information of the 29 Grasslands sites studied for detailed P fractionation.

| Soil ID | Location<br>(County) | Soil Classification                       |                       | Parental material            | Texture class   | Farm type  |
|---------|----------------------|-------------------------------------------|-----------------------|------------------------------|-----------------|------------|
|         |                      | Irish Soil<br>Classification <sup>1</sup> | World Reference Base  |                              |                 |            |
| T01     | Wexford              | SBE                                       | StagnicCambisol       | Bedrock Sandstone and Shales | Loam            | Beef       |
| T16     | Wexford              | TBE                                       | Haplic Cambisol       | Drift Siliceous Stones       | Loam            | Drystock   |
| T82     | Wexford              | SBE                                       | Stagnic Cambisol      | Bedrock Sandstone and Shales | Loam            | Beef       |
| S62     | Kilkenny             | SBE                                       | Stagnic Cambisol      | Drift Sandstone              | Loam            | Dairy      |
| S64     | Kilkenny             | HBE                                       | Humic Cambisol        | Bedrock Shales               | Loam            | Drystock   |
| M352    | Galway               | CGWG                                      | Calcic Gleysol        | Bedrock Limestone            | Clay Loam       | Drystock   |
| X07     | Cork                 | TBE                                       | Haplic Cambisol       | Bedrock Sandstone            | Loam            | Dairy      |
| X06     | Cork                 | TSWG                                      | Haplic Stagnosol      | Bedrock Sandstone and Shales | Loam            | Dairy      |
| X29     | Waterford            | TSWG                                      | Haplic Stagnosol      | Drift Siliceous Stones       | Loam            | Beef       |
| S31     | Waterford            | Luv                                       | Haplic Luvisol        | Bedrock Sandstone            | Loam            | Dairy      |
| M90     | Roscommon            | TBP                                       | Haplic Podzol         | Drift Siliceous Stones       | Sandy Loam      | Drystock   |
| M74     | Galway               | GBE                                       | Gleyic Cambisol       | Bedrock Sandstone            | Sandy Loam      | Dairy      |
| M56     | Galway               | TBP                                       | Haplic Podzol         | Drift Siliceous Stones       | Sandy Loam      | Beef       |
| W08     | Kerry                | HBP                                       | Humic Podzol          | Bedrock Sandstone            | Sandy Loam      | Beef       |
| R04     | Kerry                | HSWG                                      | Humic Stagnosol       | Bedrock Sandstone            | Clay Loam       | Dairy/Beef |
| H112    | Leitrim              | HSWG                                      | Humic Stagnosol       | Drift Siliceous Stones       | Clay Loam       | Beef       |
| O07     | Meath                | TBE                                       | Haplic Cambisol       | Bedrock Sandstone            | Loam            | Beef       |
| R301    | Cork                 | TSWG                                      | Haplic Stagnosol      | Bedrock Sandstone            | Clay Loam       | Beef       |
| R302    | Cork                 | HSWG                                      | Humic Stagnosol       | Bedrock Sandstone            | Loam            | Dairy      |
| H90     | Louth                | HBE                                       | Humic Cambisol        | Bedrock Sandstone and Shales | Clay Loam       | Beef       |
| S19     | Tipperary            | TBE                                       | Haplic Cambisol       | Bedrock Sandstone            | Loam            | Sheep      |
| M252    | Mayo                 | TBE                                       | Haplic Cambisol       | Bedrock Limestone            | Loam            | Sheep      |
| M15     | Mayo                 | HCB                                       | Humic Calcic Cambisol | Drift Limestone              | Clay Loam       | Beef       |
| M48     | Mayo                 | HBE                                       | Humic Cambisol        | Bedrock Sandstone            | Loam            | Dairy      |
| M71     | Galway               | HCB                                       | Humic Cambisol        | Bedrock Limestone            | Loam            | Beef       |
| M79     | Roscommon            | SBE                                       | Stagnic Cambisol      | Drift Siliceous Stones       | Loam            | Dairy      |
| S04     | Tipperary            | HSWG                                      | Humic Stagnosol       | Bedrock Sandstone            | Silty Clay Loam | Dairy      |
| S86     | Carlow               | CGWG                                      | Calcic Gleysol        | Bedrock Limestone            | Loam            | Dairy      |
| M29     | Mayo                 | TCBE                                      | Haplic Cambisol       | Drift Limestone              | Sandy Loam      | Beef       |

<sup>1</sup> **Brown Earth:** Stagnic (SBE), Typical (TBE); Humic (HBE); Gleyic (GBE); Humic Calcareous (HCB); Typical Calcareous (TCBE); **Surfacewater Gley:** Typical (TSWG); Humic (HSWG); **Calcareous Groundwater Gley** (CGWG); **Brown Podzolic:** Typical (TBP); Humic (HBP); **Luvisol** (Luv)

**Table S2** Percentage variance explained by each component (PC) and corresponding loadings in a principal component analysis (PCA) of P fractions in 29 grassland soils. Numbers in brackets correspond to the PCA loadings. Bold numbers represent a significant ( $p < 0.05$ ) correlation coefficient ( $r$ ).

|                         | PC1                                | PC2                  | PC3                  |
|-------------------------|------------------------------------|----------------------|----------------------|
| Variation explained (%) | 38.90                              | 24.13                | 21.37                |
| Cumulative variance (%) | 38.90                              | 63.03                | 84.40                |
| Eigenvalue              | 1.23                               | 0.97                 | 0.91                 |
| <b>P fractions</b>      | Correlation coefficient (loadings) |                      |                      |
| H <sub>2</sub> O Pi     | -0.09 (-0.01)                      | <b>0.88 (0.21)</b>   | 0.10 (-0.04)         |
| H <sub>2</sub> O Po     | 0.19 (0.04)                        | -0.32 (-0.09)        | 0.08 (0.11)          |
| NaHCO <sub>3</sub> Pi   | -0.07 (-0.06)                      | <b>0.56 (0.37)</b>   | <b>0.61 (0.31)</b>   |
| NaHCO <sub>3</sub> Po   | <b>0.70 (0.23)</b>                 | -0.39 (-0.17)        | <b>0.50 (0.22)</b>   |
| NaOH Pi                 | 0.44 (0.31)                        | <b>0.81 (0.67)</b>   | 0.21 (-0.10)         |
| NaOH Po                 | <b>0.67 (0.41)</b>                 | <b>-0.56 (-0.49)</b> | 0.40 (0.36)          |
| NaOHsn Pi               | 0.18 (0.08)                        | <b>0.74 (0.26)</b>   | -0.29 (-0.22)        |
| NaOHsn Po               | 0.38 (0.10)                        | -0.03 (0.03)         | <b>-0.51 (-0.27)</b> |
| HCl Pi                  | <b>-0.86 (-0.73)</b>               | 0.04 (0.02)          | 0.37 (0.50)          |
| HCl Po                  | -0.17 (-0.05)                      | -0.25 (-0.10)        | -0.08 (-0.04)        |
| Residual P              | -0.57 (-0.33)                      | -0.15 (-0.14)        | <b>-0.78 (-0.57)</b> |
